# Supplementary material
Source: PubMed Central journal article supplement (PMC6711406)
Supplement: EMS83969-supplement-Supplementary_file_1.pdf [file EMS83969-supplement-Supplementary_file_1.pdf]

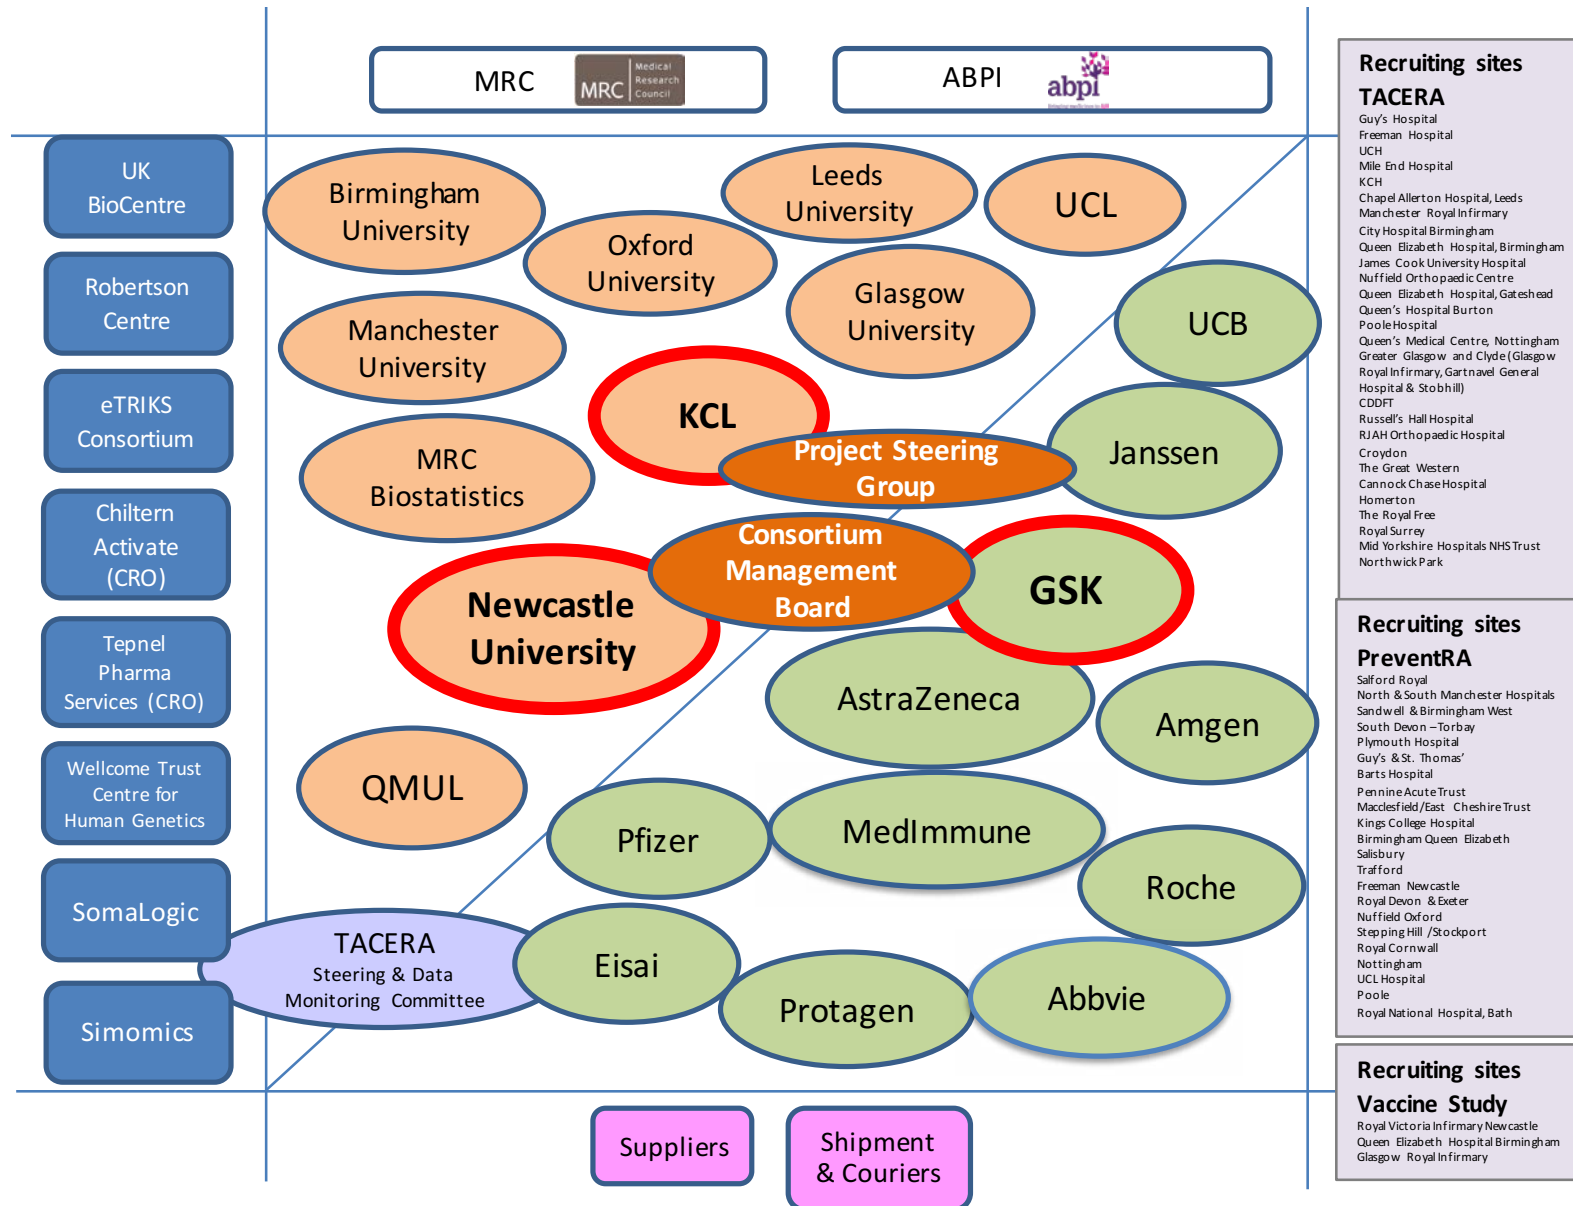

**Supplementary Figure S1:** The RA-MAP Consortium. Participating academic (beige) and industry (green) partners are represented (centre), with work package lead partners identified in red. Collaborators and Participating NHS sites are also listed (left and right, respectively).
