# Supplementary material
Source: PubMed Central journal article supplement (PMC6711406)
Supplement: EMS83969-supplement-Supplementary_file_2.pdf [file EMS83969-supplement-Supplementary_file_2.pdf]

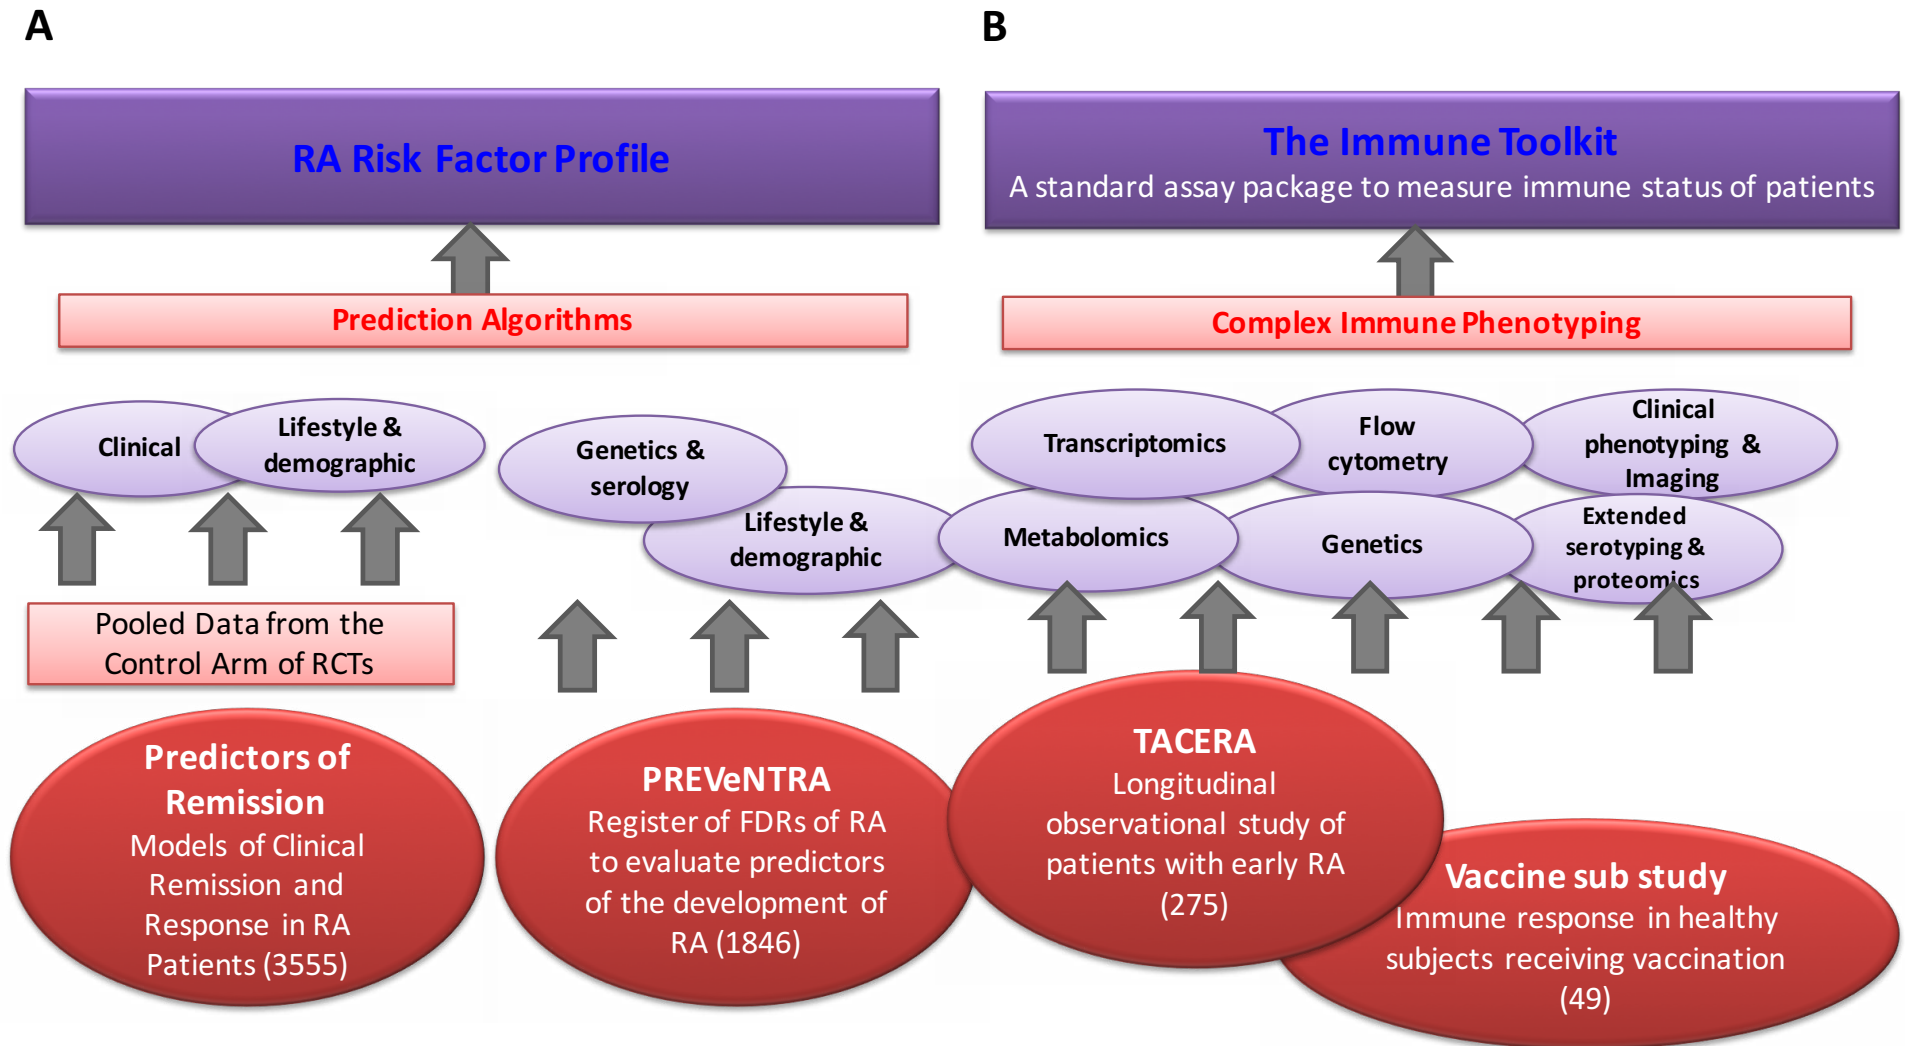

**Supplementary Figure S2:** The RA-MAP Research Programme. The breakdown of research tasks is illustrated according to experimental goals, which focused on (A) RA risk profiling through the development of prediction algorithms and (B) the development of an immune toolkit for patient stratification.
