# Supplementary material
Source: PubMed Central journal article supplement (PMC6711406)
Supplement: EMS83969-supplement-Supplementary_file_3.pdf [file EMS83969-supplement-Supplementary_file_3.pdf]

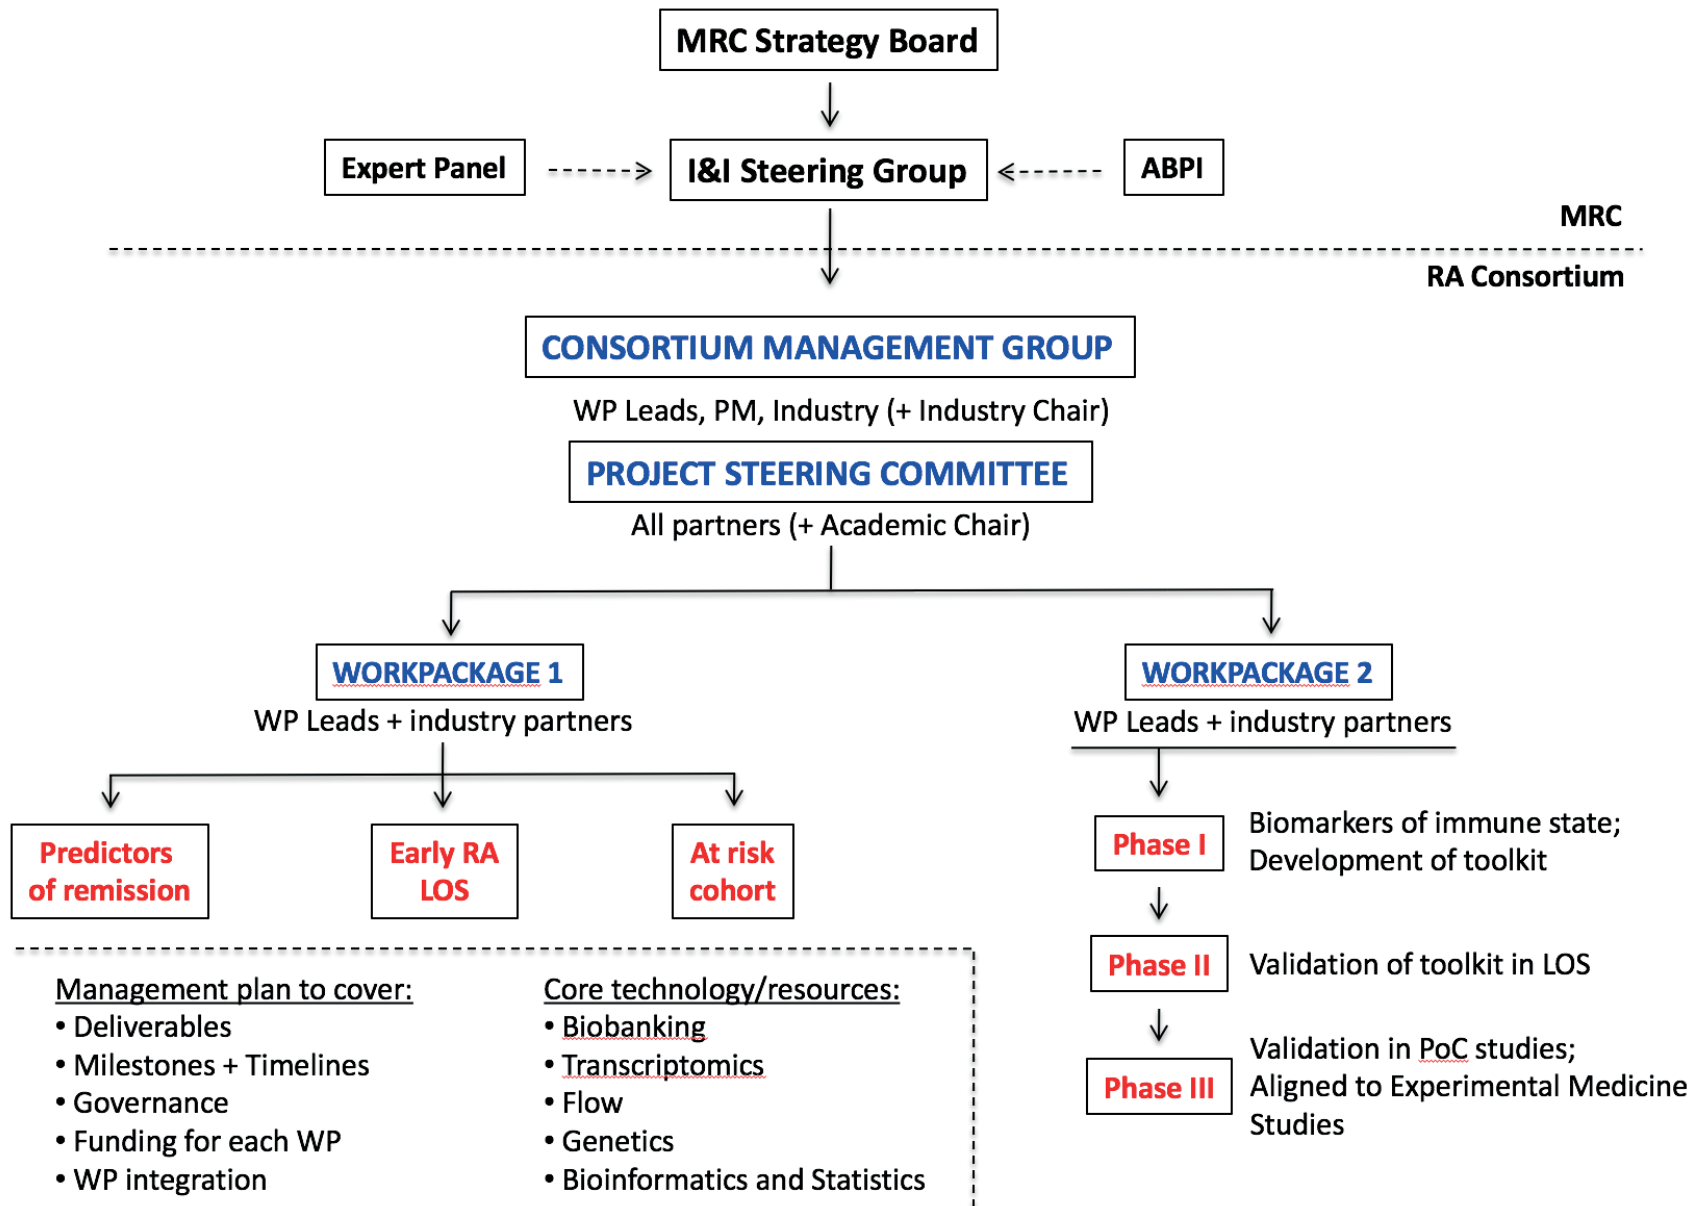

**Supplementary Figure S3:** Project management and reporting lines. The operational structure for coordinating activities of the RA-MAP Consortium by research work package. ABPI, Association of the British Pharmaceutical Industry; I&I, Immunity and Inflammation; LOS, longitudinal observational study; MRC, Medical Research Council; PM, project manager; PoC, proof-of-concept; WP, work package.
