# Supplementary material
Source: PubMed Central journal article supplement (PMC6711406)
Supplement: EMS83969-supplement-Supplementary_file_4.pdf [file EMS83969-supplement-Supplementary_file_4.pdf]

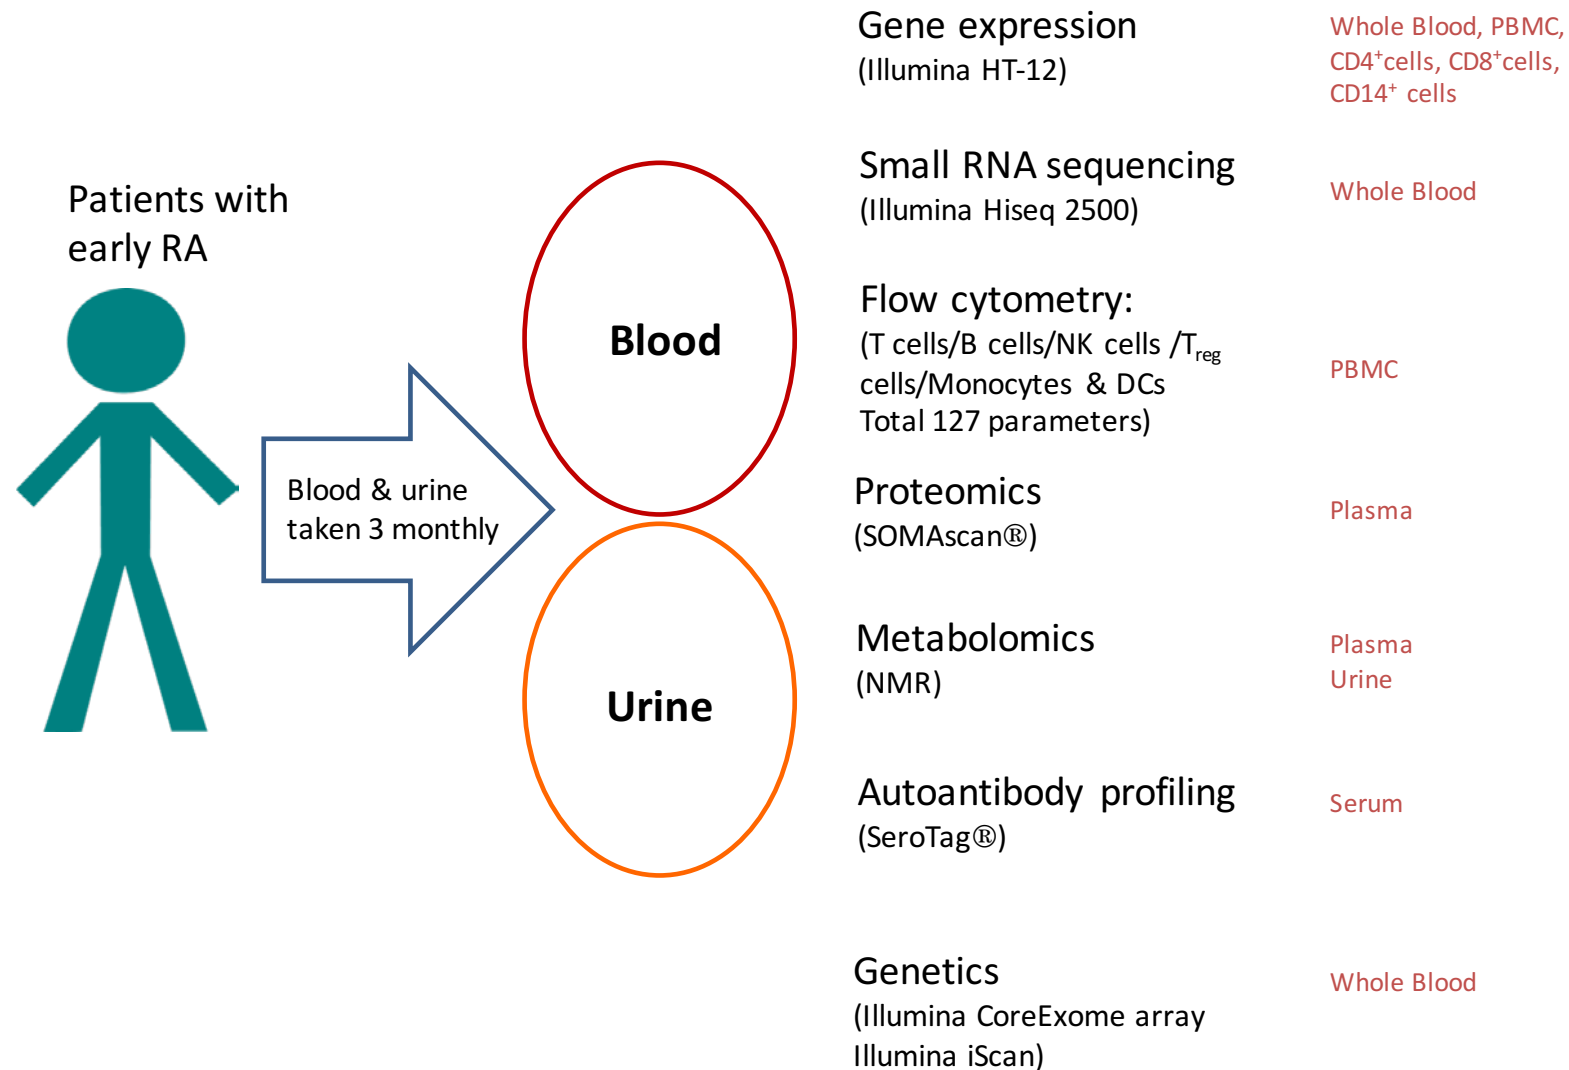

**Supplementary Figure S4:** RA-MAP core technologies. For the TACERA study, biological samples were acquired at every 3-monthly study visit and shipped to academic laboratory hubs for processing and storage. Subsequently, samples were distributed to specialist units for analysis using the platforms shown.
