# Supplementary material
Source: PubMed Central journal article supplement (PMC6711406)
Supplement: EMS83969-supplement-Supplementary_file_5.pdf [file EMS83969-supplement-Supplementary_file_5.pdf]

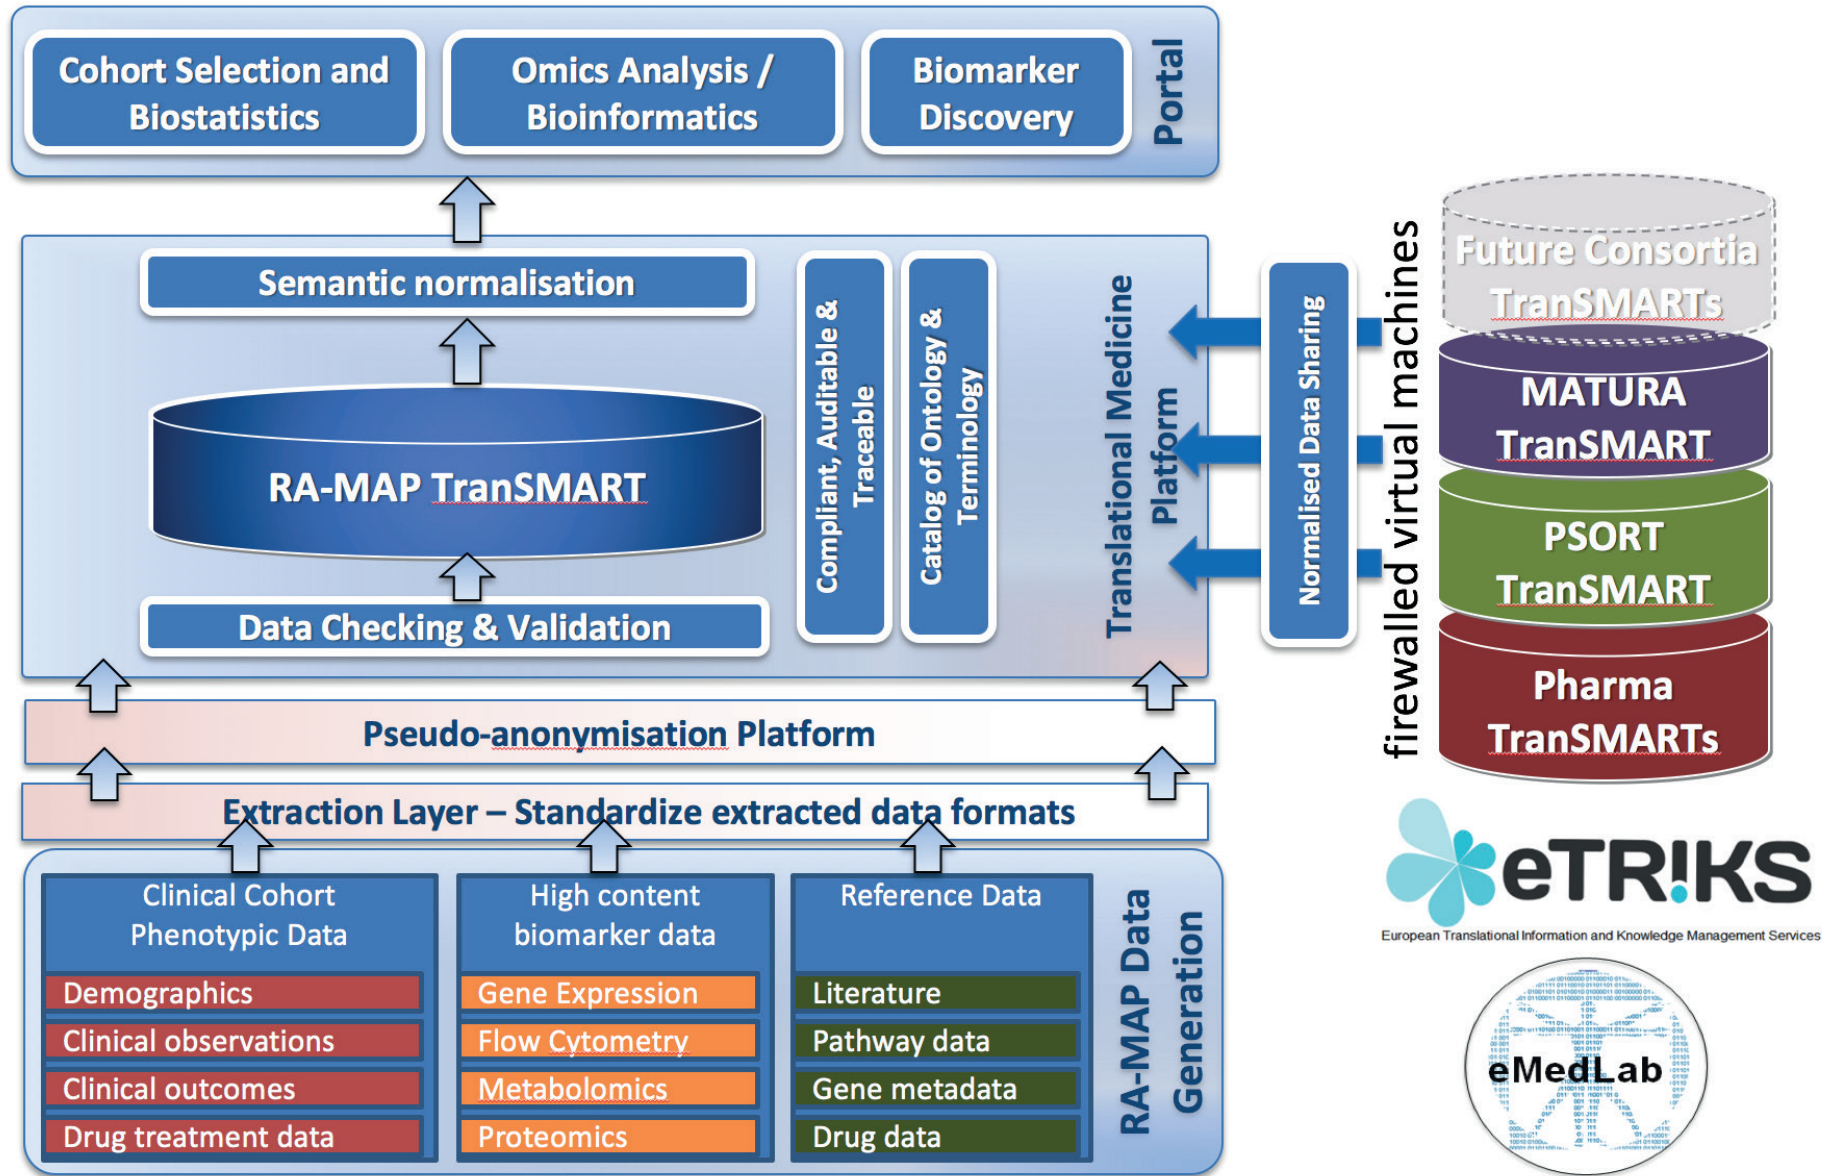

**Supplementary Figure S5:** Managing ‘big data’. Schematic highlighting the structure and constituents of the data from the RA-MAP Consortium and affiliated datasets.
