# Supplementary material
Source: PubMed Central journal article supplement (PMC6711406)
Supplement: EMS83969-supplement-Supplementary_file_6.pdf [file EMS83969-supplement-Supplementary_file_6.pdf]

Supplementary Table S6 - Contributing authors and their competing interests

| Name                          | Affiliation                                                                                                                                                               | Competing interest statement                                                                                                   |
|-------------------------------|---------------------------------------------------------------------------------------------------------------------------------------------------------------------------|--------------------------------------------------------------------------------------------------------------------------------|
| Andrew P. Cope                | Academic Department of Rheumatology, Division of Immunology, Infection and Inflammatory Disease, Faculty of Life Sciences and Medicine, King's College London, London, UK | Consultant and/or Honoraria to BMS, Roche, GSK, Eisai, Janssen.                                                                |
| Michael R. Barnes             | Centre for Translational Bioinformatics, William Harvey Research Institute, Barts and The London School of Medicine and Dentistry, Queen Mary University of London        | None                                                                                                                           |
| Alexandra Belson              | Immunoinflammation TA, Pharma R&D, GlaxoSmithKline                                                                                                                        | Shareholder in GSK                                                                                                             |
| Michael Binks                 | Immunoinflammation TA, Pharma R&D, GlaxoSmithKline                                                                                                                        | Shareholder in GSK and Pfizer                                                                                                  |
| Sarah Brockbank               | Institute of Cellular Medicine, Newcastle University                                                                                                                      | None                                                                                                                           |
| Francisco Bonachela-Capdevila | Janssen Pharmaceutica NV, 2340,Beerse, Belgium                                                                                                                            | FBC is an employee in the Johnson and Johnson family of companies                                                              |
| Claudio Carini                | Pfizer and Dept of Asthma, Allergy & Lung Biology, KCL, London, UK                                                                                                        | None                                                                                                                           |
| Benjamin A Fisher             | University of Birmingham and University Hospitals Birmingham NHS Trust and Sandwell and West Birmingham Hospitals NHS Trust                                               | None                                                                                                                           |
| Carl S. Goodyear              | Institute of Infection, Immunity and Inflammation, College of Medical, Veterinary and Life Sciences, University of Glasgow, Glasgow, UK                                   | Research funding, consultancy and/or honoraria from Abbvie, AstraZeneca, Becton Dickenson, BMS, Janssen, MedImmune, and Pfizer |
| Paul Emery                    | Leeds Institute of Rheumatic and Musculoskeletal Medicine , University of Leeds, Leeds, UK                                                                                | None                                                                                                                           |
| Michael R Ehrenstein          | Division of Medicine, UCL                                                                                                                                                 | None                                                                                                                           |
| Neil Gozzard                  | UCB Pharma                                                                                                                                                                | None                                                                                                                           |
| Ray Harris                    | Eisai Limited, European Knowledge Centre, Mosquito Way, Hatfield, Herts AL10 9SN                                                                                          | An employee of Eisai Limited.                                                                                                  |
| Sally Hollis                  | Biometrics and Information Sciences, both at Global Medicines Development, AstraZeneca                                                                                    | None                                                                                                                           |
| Sarah Keidel                  | Medical Affairs, Abbvie Ltd,                                                                                                                                              | Employee of AbbVie Inc                                                                                                         |

|                          |                                                                                                                                                                                                                                                                                 |                                                                                                                                                 |
|--------------------------|---------------------------------------------------------------------------------------------------------------------------------------------------------------------------------------------------------------------------------------------------------------------------------|-------------------------------------------------------------------------------------------------------------------------------------------------|
|                          | Maidenhead SL6 4UB, UK                                                                                                                                                                                                                                                          |                                                                                                                                                 |
| Marc Levesque            | Immunology Clinical Development, Abbvie Bioresearch Center Inc., Worcester, MA, USA.                                                                                                                                                                                            | Employee of AbbVie Inc                                                                                                                          |
| Catharina Lindholm       | Inflammation, Autoimmunity & Neuroscience, AstraZeneca                                                                                                                                                                                                                          | None                                                                                                                                            |
| Michael F. McDermott     | National Institute for Health Research–Leeds Musculoskeletal Biomedical Research Centre (NIHR-LMBRC) and Leeds Institute of Rheumatic and Musculoskeletal Medicine (LIRMM), Wellcome Trust Brenner Building, St James’s University Hospital, Beckett Street, Leeds, LS9 7TF, UK | None                                                                                                                                            |
| Iain B. McInnes          | Institute of Infection, Immunity and Inflammation, College of Medical, Veterinary and Life Sciences, University of Glasgow, Glasgow, UK                                                                                                                                         | Grants and/or personal fees from AbbVie, AstraZeneca, BMS, Celgene, Crescendo Bioscience, Janssen, MSD, Novartis, Lilly, UCB, Amgen, and Pfizer |
| Christopher M. Mela      | Roche Products Ltd. 6 Falcon Way, Shire Park, Welwyn Garden City, AL7 1TW. UK                                                                                                                                                                                                   | C.M. Mela is an employee of Roche Products Ltd.                                                                                                 |
| Gerry Parker             | UCB Pharma                                                                                                                                                                                                                                                                      | None                                                                                                                                            |
| Simon Read               | Grunenthal Ltd, Stokenchurch Business Park, Ibstone Road, Stokenchurch, High Wycombe HP14 3FE                                                                                                                                                                                   | None                                                                                                                                            |
| Ayako Wakatsuki Pedersen | Institute of Cellular Medicine, Newcastle University                                                                                                                                                                                                                            | None                                                                                                                                            |
| Frederique Ponchel       | Leeds Institute of Rheumatic and Musculoskeletal Medicine , University of Leeds                                                                                                                                                                                                 | None                                                                                                                                            |
| Duncan Porter            | Institute of Infection, Immunity and Inflammation, College of Medical, Veterinary and Life Sciences, University of Glasgow                                                                                                                                                      | Research funding and honoraria from Pfizer                                                                                                      |
| Ravi Rao                 | Specialty Franchise, Global Medical, Pharma R&D, GlaxoSmithKline                                                                                                                                                                                                                | Shareholder in GSK                                                                                                                              |
| Anthony Rowe             | Janssen Research & Development Ltd, High Wycombe, UK                                                                                                                                                                                                                            | AR is an employee and shareholder in the Johnson and Johnson family of companies                                                                |
| Peter Schulz-Knappe      | Protagen AG, 44227 Dortmund, Otto-Hahn Street 15, Germany                                                                                                                                                                                                                       | Employee and shareholder of Protagen AG                                                                                                         |
| Matthew A. Sleeman       | Respiratory, Inflammation & Autoimmunity, MedImmune                                                                                                                                                                                                                             | M. Sleeman was a full time employee of MedImmune, a                                                                                             |

|                 |                                                                                                                                                                                                                                                                                    |                                                                                                                                                                                                             |
|-----------------|------------------------------------------------------------------------------------------------------------------------------------------------------------------------------------------------------------------------------------------------------------------------------------|-------------------------------------------------------------------------------------------------------------------------------------------------------------------------------------------------------------|
|                 | Ltd, Cambridge, UK.                                                                                                                                                                                                                                                                | wholly owned subsidiary of AstraZeneca.                                                                                                                                                                     |
| Deborah Symmons | Centre for Musculoskeletal Research, School of Biological Sciences, Faculty of Biology, Medicine and Health, University of Manchester NIHR Manchester Musculoskeletal Biomedical Research Unit, Central Manchester NHS Foundation Trust, Manchester Academic Health Science Centre | No competing interest                                                                                                                                                                                       |
| Peter C. Taylor | Norman Collisson Professor of Musculoskeletal Sciences Head of Clinical Sciences Botnar Research Centre Nuffield Department of Orthopaedics, Rheumatology and Musculoskeletal Sciences, University of Oxford Botnar Research Centre, Windmill Road, Headington, Oxford, OX3 7LD.   | Research grants to Oxford University UCB, GSK, Celgene, Galapagos, Abide therapeutics. Consultation and/or speaking Roche, UCB, GSK, BMS, Lilly, Pfizer, Janssen, AbbVie, Biogen, Sandoz, Novartis, Sanofi. |
| Brian Tom       | MRC Biostatistics Unit, University of Cambridge                                                                                                                                                                                                                                    | None                                                                                                                                                                                                        |
| Wayne Tsuji     | Medical Sciences, Early Development , Amgen                                                                                                                                                                                                                                        | Former Amgen employee; Amgen shareholder                                                                                                                                                                    |
| Denny Verbeeck  | Janssen Pharmaceutica NV, 2340, Beerse, Belgium                                                                                                                                                                                                                                    | Employee in the Johnson and Johnson family of companies                                                                                                                                                     |
| John D. Isaacs  | NIHR Newcastle Biomedical Research Centre in Ageing and Long-term Conditions, Institute of Cellular Medicine, Newcastle University and Musculoskeletal Unit, Newcastle upon Tyne Hospitals NHS Foundation Trust, Newcastle, UK                                                     | Consultant to: Pfizer, Lilly, Abbvie, Janssen, Celltrion, Epirus, Boehringer, Baxalta<br>Research support: Pfizer<br>Speaker: Roche, BMS, Pfizer                                                            |
