# Supplementary material
Source: PubMed Central journal article supplement (PMC6711406)
Supplement: EMS83969-supplement-Supplementary_file_7.pdf [file EMS83969-supplement-Supplementary_file_7.pdf]

**RA-MAP CONSORTIUM MEMBERSHIP (2012 – current)****Newcastle University (Institute of Cellular Medicine):**

**NIHR Newcastle Biomedical Research Centre in Ageing and Long-term Conditions, Institute of Cellular Medicine, Newcastle University and Musculoskeletal Unit, Newcastle upon Tyne Hospitals NHS Foundation Trust**

John Isaacs  
Sarah Brockbank  
Ayako Wakatsuki Pedersen  
Catharien Hilkens  
Amy Anderson  
Philip Stocks  
Dennis Lendrem  
Jessica Tarn  
Graham Smith  
John Casement  
Julie Diboll  
Rachel Harry

**Kings College London:**

**Academic Department of Rheumatology, Division of Immunology, Infection and Inflammatory Disease, Faculty of Life Sciences, King's College London, Guy's and St Thomas' NHS Foundation Trust, NIHR Biomedical Research Centre at Guy's and St Thomas' NHS Foundation Trust at King's College London.**

Andrew P. Cope  
Gemma Simpson  
Ruth Toward  
Hayley Noble  
Angela Parke  
Wing Wu  
Fiona Clarke  
David Scott  
Ian C Scott  
James Galloway  
Heidi Lempp  
Fowzia Ibrahim  
Samana Schwank

**Department of Immunobiology, Division of Immunology, Infection and Inflammatory Disease, Faculty of Life Sciences, King's College London**

Gemma Molyneux  
Tomi Lazarov  
Frederic Geissmann

**University of Glasgow**

**Institute of Infection, Immunity and Inflammation, College of Medical, Veterinary and Life Sciences, University of Glasgow, Glasgow, UK**

Carl S. Goodyear  
Iain B. McInnes  
Iona Donnelly  
Ashley Gilmour  
Aysin Tulunay Virkan

**Gartnavel General Hospital, Glasgow, UK**

Duncan Porter

**University of Leeds (Leeds Institute of Rheumatic and Musculoskeletal Medicine)**

Frederique Ponchel  
Paul Emery  
Jehan El-Jawhari  
Rekha Parmer  
Michael F. McDermot  
Maya Buch

**University of Birmingham**

Benjamin A Fisher  
Chris Buckley  
Steve Young  
Philip Jones  
Karim Raza  
Andrew Filer

**[BAF, CB and AF: University of Birmingham and University Hospitals Birmingham NHS Trust and Sandwell and West Birmingham Hospitals NHS Trust]**

**[KR: University of Birmingham and Sandwell and West Birmingham Hospitals NHS Trust]**

**Queen Mary University London**

**Centre for Experimental Medicine and Rheumatology, William Harvey Research Institute, Barts and The London School of Medicine and Dentistry, Queen Mary University of London, London, UK**

Costantino Pitzalis  
Georgina Thorborn  
Liliane Fossati-Jimack  
Stephen Kelly  
Frances Humby  
Tanya Novak  
Sharmila Rana  
Katriona Goldmann  
Myles Lewis

**Centre for Translational Bioinformatics, William Harvey Research Institute, Barts and The London School of Medicine and Dentistry, Queen Mary University of London, London, UK**

Michael R Barnes  
David Watson  
Zhilong Jia

**University College London (Division of Medicine)**

Michael R Ehrenstein  
Gioia Altobelli  
Chris John  
Sandra Martins  
Dao Nguyen  
Humayara Ali

**University of Manchester**

**Centre for Musculoskeletal Research, School of Biological Sciences, Faculty of Biology, Medicine and Health, University of Manchester; NIHR Manchester Musculoskeletal Biomedical Research Unit, Central Manchester NHS Foundation Trust, Manchester Academic Health Science Centre**

Deborah Symmons  
Jane Worthington  
Ian Bruce  
James Sergeant  
Suzanne Verstappen  
Neil D'costa  
Fiona Stirling

Adwoa Hughes-Morley

**MRC Biostatistics Unit, University of Cambridge**

Brian Tom  
Vernon Farewell  
Yujie Zhong

**University of Oxford**

**Botnar Research Centre, Nuffield Department of Orthopaedics, Rheumatology and Musculoskeletal Sciences, University of Oxford**

Peter C. Taylor

**Abbvie Inc**

| Name              | Affiliation                                                                          |
|-------------------|--------------------------------------------------------------------------------------|
| Sarah Keidel      | Medical Affairs, Abbvie Ltd, Maidenhead SL6 4UB, UK                                  |
| Carolyn Cuff      | Translational Immunology, AbbVie Bioresearch Center Inc., Worcester, MA, USA.        |
| Marc Levesque     | Immunology Clinical Development, Abbvie Bioresearch Center Inc., Worcester, MA, USA. |
| Andy Long         | Immunology Pharmacology, AbbVie Bioresearch Center Inc., Worcester, MA, USA.         |
| Zheng Liu         | Translational Immunology, AbbVie Bioresearch Center Inc., Worcester, MA, USA.        |
| Samantha Lipsky   | Information Research, AbbVie Bioresearch Center Inc., Worcester, MA, USA.            |
| Bohdan Harvey     | Global Biologics, AbbVie Bioresearch Center Inc., Worcester, MA, USA.                |
| Michael Macoritto | Translational Immunology, AbbVie Bioresearch Center Inc., Worcester, MA, USA.        |
| Feng Hong         | Exploratory Statistics, AbbVie Bioresearch Center Inc., Worcester, MA, USA.          |
| Sukru Kaymakcalan | Information Research, AbbVie Bioresearch Center Inc., Worcester, MA, USA.            |

**Amgen**

| Name          | Affiliation                                    |
|---------------|------------------------------------------------|
| Wayne Tsuji   | Cascadia Drug Development Group                |
| Tony Sabin    | Medical Sciences Biostatistics group at Amgen. |
| Neil Ward     | Amgen                                          |
| Susan Talbot  | Amgen                                          |
| Desmond Padhi | Amgen                                          |

**MedImmune**

| Name            | Affiliation                                                                                                                    |
|-----------------|--------------------------------------------------------------------------------------------------------------------------------|
| Matthew Sleeman | Current affiliation: Dept Immunology & Inflammation, Regeneron Pharmaceuticals, Tarrytown, NY, USA                             |
| Donna Finch     | Respiratory, Inflammation & Autoimmunity, MedImmune Ltd, Cambridge, UK.                                                        |
| Athula Herath   | Biostatistics, MedImmune Ltd, Cambridge, UK.<br>Current: Novartis Pharmaceuticals UK Ltd, Frimley, Camberley, Surrey GU16 7SR. |

**AstraZeneca**

| Name               | Affiliation                                                                          |
|--------------------|--------------------------------------------------------------------------------------|
| Catharina Lindholm | Inflammation, Autoimmunity & Neuroscience, Global Medicines Development, AstraZeneca |
| Martin Jenkins     | Biometrics and Information Sciences, Global Medicines Development,                   |

|                |                                                                                                                          |
|----------------|--------------------------------------------------------------------------------------------------------------------------|
|                | AstraZeneca                                                                                                              |
| Meilien Ho     | <i>Deceased. Formerly:</i> Inflammation, Autoimmunity & Neuroscience, Global Medicines Development, AstraZeneca          |
| Sally Hollis   | Statistical Consulting, Phastar. Formerly Biometrics and Information Sciences, Global Medicines Development, AstraZeneca |
| Chris Marshall | BioSci Consulting                                                                                                        |

**UCB Pharma**

| Name           | Affiliation |
|----------------|-------------|
| Neil Gozzard   | UCB Pharma  |
| Gerry Parker   | UCB Pharma  |
| Matt Page      | UCB Pharma  |
| Hannah Edwards | UCB Pharma  |
| Alexandru Cuza | UCB Pharma  |

**Janssen**

| Name                          | Affiliation                                                          |
|-------------------------------|----------------------------------------------------------------------|
| Anthony Rowe                  | Janssen Research & Development Ltd, High Wycombe, UK                 |
| Francisco Bonachela Capdevila | Janssen Pharmaceutica NV, 2340, Beerse, Belgium                      |
| Matthew Loza                  | Janssen Research & Development, LLC, Spring House, Pennsylvania, USA |
| Mark Curran                   | Janssen Research & Development, LLC, Spring House, Pennsylvania, USA |
| Denny Verbeeck                | Janssen Pharmaceutica NV, 2340, Beerse, Belgium                      |
| Dan Baker                     | Janssen Research & Development, LLC, Spring House, Pennsylvania, USA |

**Roche**

| Name               | Affiliation                                                                    |
|--------------------|--------------------------------------------------------------------------------|
| Christopher M Mela | Roche Products Ltd. 6 Falcon Way, Shire Park, Welwyn Garden City, AL7 1TW, UK. |
| Ivana Vranic       | Roche Products Ltd. 6 Falcon Way, Shire Park, Welwyn Garden City, AL7 1TW, UK. |
| Catherine T Mela   | Roche Products Ltd. 6 Falcon Way, Shire Park, Welwyn Garden City, AL7 1TW, UK. |
| Stephen Wright     | Roche Products Ltd. 6 Falcon Way, Shire Park, Welwyn Garden City, AL7 1TW, UK. |
| Lucy Rowell        | Roche Products Ltd. 6 Falcon Way, Shire Park, Welwyn Garden City, AL7 1TW, UK. |
| Emma Vernon        | Roche Products Ltd. 6 Falcon Way, Shire Park, Welwyn Garden City, AL7 1TW, UK. |
| Nina Joseph        | Roche Products Ltd. 6 Falcon Way, Shire Park, Welwyn Garden City, AL7 1TW, UK. |
| Neil Payne         | Roche Products Ltd. 6 Falcon Way, Shire Park, Welwyn Garden City, AL7 1TW, UK. |

**GSK**

| Name             | Affiliation                                             |
|------------------|---------------------------------------------------------|
| Ravi Rao         | GSK (Specialty Franchise, Global Medical, Pharma R&D)   |
| Michael Binks    | GSK and Pfizer (Rare Disease Clinical Research, Pfizer) |
| Alexandra Belson | GSK (Immunoinflammation TA, Pharma R&D)                 |
| Valerie Ludbrook | GSK (Respiratory TA, Pharma R&D)                        |
| Kirsty Hicks     | GSK (Statistics and Programming, Pharma R&D)            |
| Hannah Tipney    | GSK (Target Sciences Computational Biology, Pharma R&D) |
| Joanne Ellis     | GSK (Immunoinflammation TA, Pharma R&D)                 |

|                      |                                                         |
|----------------------|---------------------------------------------------------|
| Samiul Hasan         | GSK (Target Sciences Computational Biology, Pharma R&D) |
| Arnaud Didierlaurent | GSK (Vaccines, R&D)                                     |
| Wivine Burny         | GSK (Vaccines, R&D)                                     |
| Andrea Haynes        | GSK (Immunoinflammation TA, Pharma R&D)                 |
| Chris Larminie       | GSK (Target Sciences Computational Biology, Pharma R&D) |

**Eisai**

| <b>Name</b>           | <b>Affiliation</b>                                                               |
|-----------------------|----------------------------------------------------------------------------------|
| Ray Harris            | Eisai Limited, European Knowledge Centre, Mosquito Way, Hatfield Herts, AL10 9SN |
| Daniela Dastros-Pitel | Eisai Limited, European Knowledge Centre, Mosquito Way, Hatfield Herts, AL10 9SN |

**Pfizer**

| <b>Name</b>         | <b>Affiliation (if differs from above)</b>                                                                  |
|---------------------|-------------------------------------------------------------------------------------------------------------|
| Claudio Carini      | Pfizer and Dept of Asthma, Allergy & Lung Biology, KCL                                                      |
| Blerina Kola        | Medical Director Inflammation, Pfizer Ltd, Walton Oaks, Walton on the Hill, Tadworth, Surrey, KT20 7NS, U.K |
| Scott Jelinsky      | Inflammation and Immunology RU, Worldwide Research & Development Pfizer Inc.                                |
| Martin Hodge        | Inflammation and Immunology RU, Worldwide Research & Development Pfizer Inc.                                |
| Mateusz Maciejewski | Inflammation and Immunology RU, Worldwide Research & Development Pfizer Inc.                                |
| Daniel Ziemek       | Inflammation and Immunology RU, Worldwide Research & Development Pfizer Inc.                                |

**Protagen**

| <b>Name</b>         | <b>Affiliation</b>                                        |
|---------------------|-----------------------------------------------------------|
| Peter Schulz-Knappe | Protagen AG, 44227 Dortmund, Otto-Hahn Street 15, Germany |
| Hans-Dieter Zucht   | Protagen AG, 44227 Dortmund, Otto-Hahn Street 15, Germany |
| Petra Budde         | Protagen AG, 44227 Dortmund, Otto-Hahn Street 15, Germany |

**Grunenthal Ltd**

| <b>Name</b> | <b>Affiliation</b>                                                                            |
|-------------|-----------------------------------------------------------------------------------------------|
| Simon Read  | Grunenthal Ltd, Stokenchurch Business Park, Ibstone Road, Stokenchurch, High Wycombe HP14 3FE |
